# Supplementary material for: The evolving role of geothermal energy for decarbonizing the United States
Source: Royal Society of Chemistry journal article supplement (doi:10.1039/d1ee02309h), 2021-01-01
Supplement: d1ee02309h1.pdf [file d1ee02309h1.pdf]

## Appendix A: Supplemental Information

### A1. Energy consumption and CO<sub>2</sub> Emission in U.S.

This section provides additional background information on energy-related CO<sub>2</sub> emissions and energy consumption characteristics in the U.S. Table A1 provides a breakdown of energy-related CO<sub>2</sub> emissions in the U.S. in 2019 by source and by sector. Burning of coal, natural gas and petroleum in the residential, commercial and industrial sectors are mostly for direct heating (and cooling) in these sectors. The associated emissions are significant: 1,618 million metric tons of CO<sub>2</sub> or about 31% of total energy-related CO<sub>2</sub> emissions. Also, a fraction of the electricity-related CO<sub>2</sub> emissions in these sectors are attributed to heating and cooling applications. For example, in the residential sector, Figure A1 reveals that about 30% of U.S. households have an electric heat source as main heating equipment.

**Table A1: Energy related CO<sub>2</sub> emissions by source and sector in the United States, 2019 (million metric tons). Table provided by EIA<sup>[186]</sup>.**

|                          | Residential | Commercial | Industrial   | Transportation | Electric power | Source total |
|--------------------------|-------------|------------|--------------|----------------|----------------|--------------|
| Coal                     | 0           | 2          | 104          | 0              | 973            | 1,076        |
| Natural gas              | 275         | 194        | 550          | 52             | 619            | 1,689        |
| Petroleum                | 69          | 59         | 365          | 1,856          | 16             | 2,365        |
| Other <sup>1</sup>       |             |            |              |                | 11             | 11           |
| Electricity <sup>2</sup> | 620         | 585        | 411          | 3              |                |              |
| <b>Sector total</b>      | <b>963</b>  | <b>839</b> | <b>1,428</b> | <b>1,912</b>   | <b>1,619</b>   | <b>5,142</b> |

<sup>1</sup>Emissions from combustion of waste materials derived from petroleum and emissions from some types of geothermal power plants.

<sup>2</sup>Electricity-related CO<sub>2</sub> emissions are based on electric power sector electricity sales to the other sectors and the emissions associated with the generation of that electricity.

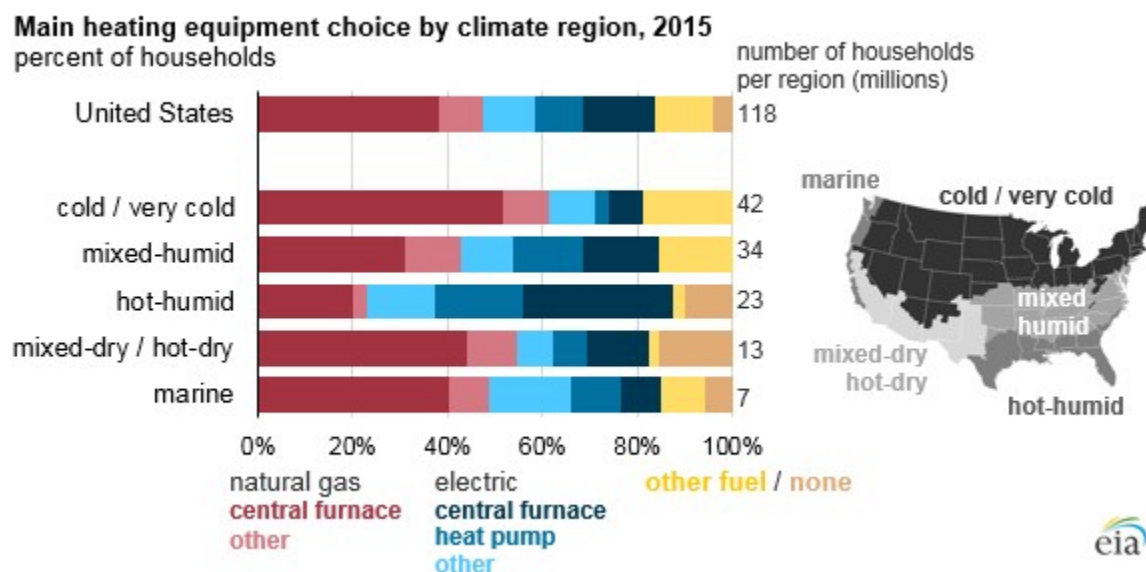

**Figure A1: Primary heating equipment choice by climate region, 2015. Figure from EIA<sup>[187]</sup>.**

Figure 1 in the paper illustrated the large fraction of heat consumption in the Northern Tier states expressed as a percentage of heat and electricity demand in the residential and commercial sector in each state. Alternative figures are provided below. Figure A2 shows the electricity consumption (left figure) and low-temperature heat consumption (right figure) in 2018 as a percentage of the total energy consumption in each state. Electricity consumption includes the electricity used for heating and cooling. Heat consumption includes low-temperature (<150°C) thermal demand in the residential, commercial, manufacturing and agricultural sector. Cold climate states (northern tier and especially northeastern states) have relatively high thermal demand while southern and western states have relatively high electricity demand. The same trends are visible when plotting the ratio of electricity demand over thermal demand for each state (Figure A3). Two apparent anomalies are North Dakota and Wyoming, which have high electricity demand in the industrial sector.

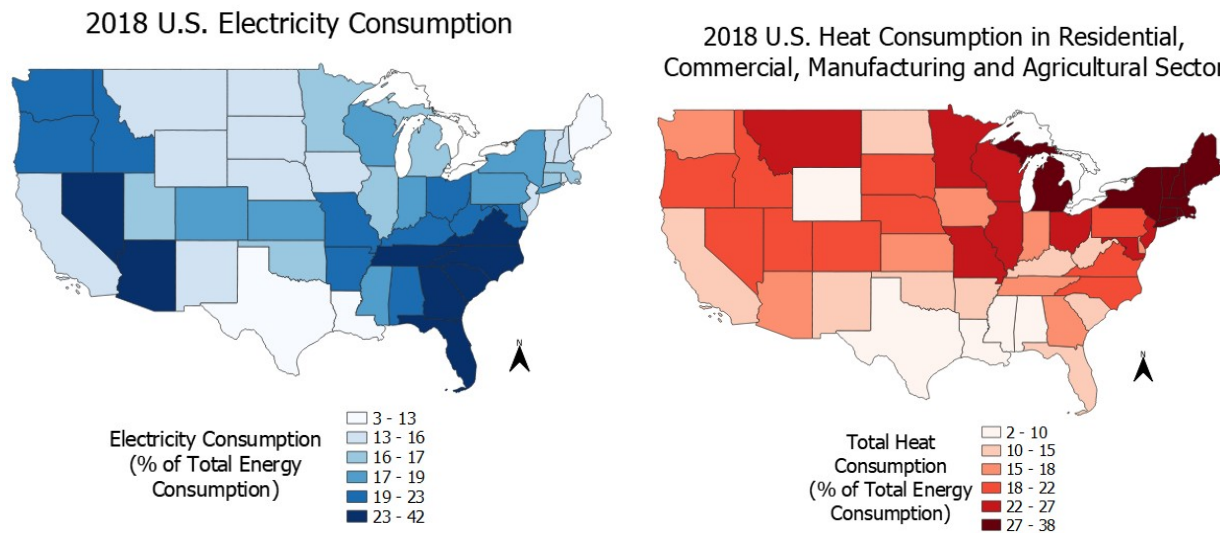

**Figure A2: 2018 U.S. electricity (left) and heat demand (right) as percentage of total energy demand by state. Heat demand includes low-temperature (<150°C) heat demand in residential, commercial, manufacturing and agricultural sector. Data from EIA<sup>[1,7-9]</sup> and McCabe et al.<sup>[10]</sup> The electricity consumption includes the electricity used for heating and cooling.**

## 2018 U.S. Heat Demand vs. Electricity Demand

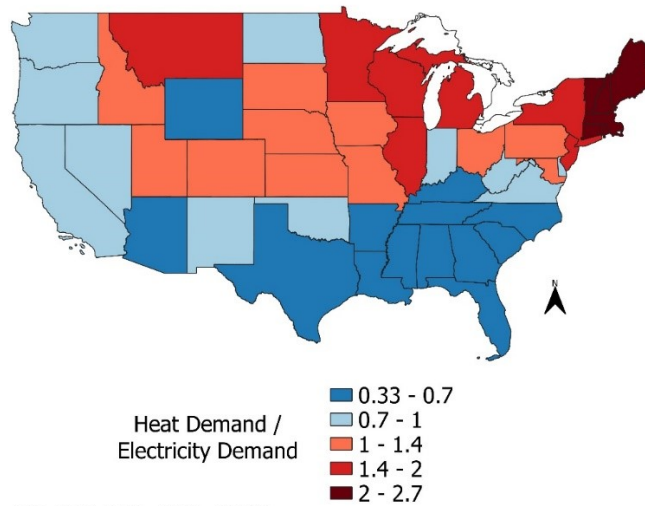

**Figure A3: 2018 U.S. heat demand vs. electricity demand by state. Heat demand includes low-temperature (<150°C) heat demand in residential, commercial, manufacturing and agricultural sector. Data from EIA<sup>[1,7-9]</sup> and McCabe et al.<sup>[10]</sup> The electricity consumption includes the electricity used for heating and cooling.**

## A2. U.S. Geothermal Resource Assessment

This section provides supporting information for the geothermal resource assessment presented in Section 5 of the paper. As discussed, the subsurface temperature is a key metric of the geothermal resource assessment. Bottom hole temperature temperatures (Figure 7) are combined with rock thermal conductivity estimates, rock heat generation figures, and the local surface temperature (Figure A4) to estimate the rock temperature at different depths. SMU has used this procedure to generate several temperature-at-depths maps. Examples are Figure 8 at 4.5 km, Figure A5 at 3.5 km and Figure A6 at 5.5 km.

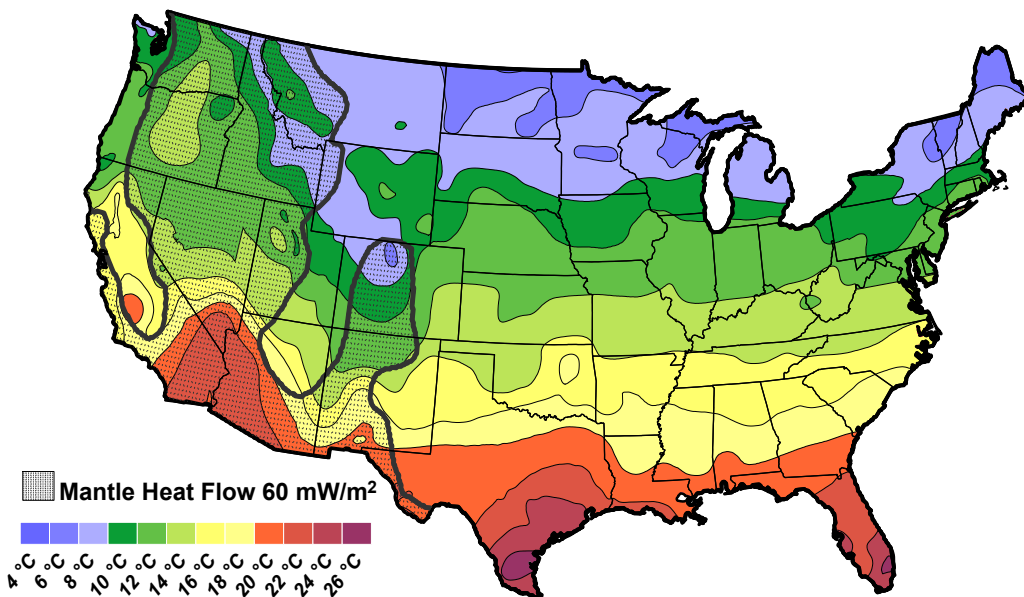

**Figure A4: Map of surface temperature<sup>[188]</sup> and mantle heat flow for the conterminous U.S.**

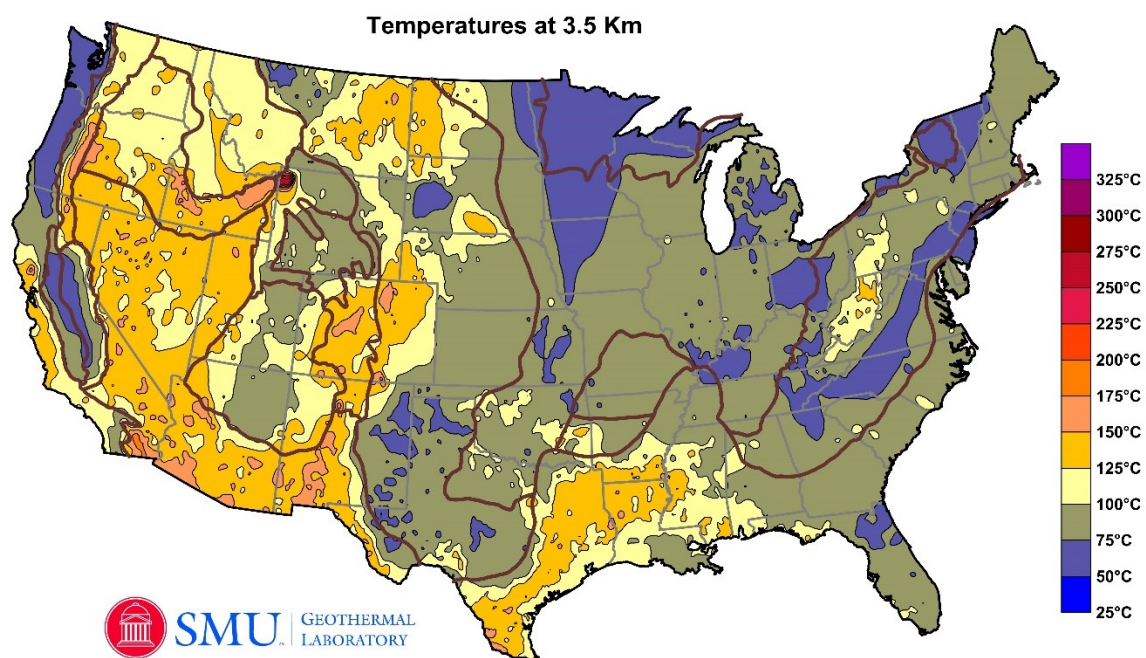

**Figure A5: Subsurface temperature at 3.5 km depth estimated by SMU Geothermal Laboratory<sup>[20]</sup> based on well bottom hole temperatures and rock thermo-physical properties.**

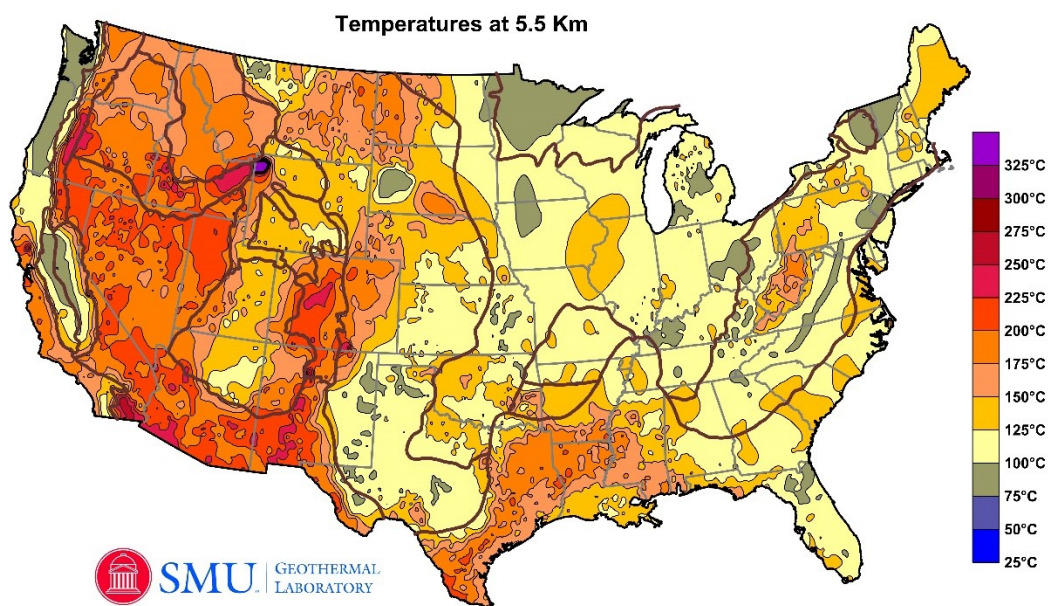

**Figure A6: Subsurface temperature at 5.5 km depth estimated by SMU Geothermal Laboratory<sup>[20]</sup> based on well bottom hole temperatures and rock thermo-physical properties.**

A summary of the non-hydrothermal geothermal resources assessment for the U.S. as presented in the Future of Geothermal Energy Report<sup>[31]</sup> is provided in Table A2. Resources

considered include geopressured systems, co-produced fluid, sedimentary basin EGS, conduction-dominated EGS basement rock and volcanic EGS. All protected and highly populated areas including national parks and large cities have been excluded from the resource base estimates.

**Table A2: Summary of non-hydrothermal U.S. geothermal resource-base estimates in Future of Geothermal Energy Report.<sup>[31]</sup>**

| Source & Category                                           | Thermal Energy,<br>in $10^{18} \text{J} = \text{EJ}$ | SCF* of<br>Methane x<br>$10^{12}$ | Total Gas +<br>Thermal Energy,<br>in $10^{18} \text{J} = \text{EJ}$ |
|-------------------------------------------------------------|------------------------------------------------------|-----------------------------------|---------------------------------------------------------------------|
| Geopressured (Papadopoulos et al. <sup>[189]</sup> )        | 46,000                                               | 23,700                            | 71,000                                                              |
| Geopressured (Wallace et al. <sup>[190]</sup> )             | 110,000                                              | 59,000                            | 170,000                                                             |
| Co- produced Resources                                      | 0.0944 – 0.451<br>(depends on water<br>temperature)  |                                   |                                                                     |
| Sedimentary Basin EGS (lower 48<br>states)                  | 100,000                                              |                                   |                                                                     |
| Conduction-Dominated EGS basement<br>rock (lower 48 states) | 13,900,000                                           |                                   |                                                                     |
| Volcanic (Excl. Yellowstone, + AK)<br>EGS                   | 65,000 (high)                                        |                                   |                                                                     |
| Alaska only-26 systems                                      | 9,000 (low)                                          |                                   |                                                                     |
| Hawaii -1 system                                            | 100                                                  |                                   |                                                                     |
| Alaska – all EGS                                            | 3,295,000                                            |                                   |                                                                     |
| Hawaii                                                      | N/A                                                  |                                   |                                                                     |

\* SCF = standard cubic feet of methane (ideal gas conditions) at 1 atm, 60°F.

### A3 - Alphabetical listing of references cited by first author last name

- AASG - American Association of State Geologists. (2020). *Geothermal Data Repository, Borehole Temperature Observations*.  
<http://repository.stategeothermaldata.org/repository/collection/fd62bbde5b68ce93e4ba348bc703443c/>
- Adams, M. C., & Davis, J. (1991). Kinetics of fluorescein decay and its application as a geothermal tracer. *Geothermics*, 20(1–2). [https://doi.org/10.1016/0375-6505\(91\)90005-G](https://doi.org/10.1016/0375-6505(91)90005-G)
- Aghahosseini, A., & Breyer, C. (2020). From hot rock to useful energy: A global estimate of enhanced geothermal systems potential. *Applied Energy*, 279.  
<https://doi.org/10.1016/j.apenergy.2020.115769>
- Alaskar, M. (2013). *In-situ multifunctional nanosensors for fractured reservoir characterization*. Stanford University.

- Alaskar, M., Ames, M., Liu, C., Li, K., & Horne, R. (2015). Temperature nanotracers for fractured reservoirs characterization. *Journal of Petroleum Science and Engineering*, 127. <https://doi.org/10.1016/j.petrol.2015.01.021>
- Alaskar, M., & Kosynkin, D. (2017). Successful crosswell field test of fluorescent carbogenic nanoparticles. *Journal of Petroleum Science and Engineering*, 159. <https://doi.org/10.1016/j.petrol.2017.09.048>
- Allahviridizadeh, P. (2020). A review on geothermal wells: Well integrity issues. In *Journal of Cleaner Production* (Vol. 275). <https://doi.org/10.1016/j.jclepro.2020.124009>
- Allis, R. G., & Hunt, T. M. (1986). Analysis of exploitation-induced gravity changes at Wairakei geothermal field. *Geophysics*, 51(8), 1647–1660.
- Alqahtani, H., Hussain, M. K., Shateeb, H. A. L., & Ellis, E. (2018). Characterization of ADOTS carbogenic nanoparticle tracers before and after reservoir injection. *Proceedings - SPE Annual Technical Conference and Exhibition, 2018-September*. <https://doi.org/10.2118/191573-ms>
- Ames, M., Brodrick, P., & Horne, R. (2014). A framework for comparative inverse modeling of tracers for thermal breakthrough forecasting using fracture network models. *Proceedings of Fourtieth Workshop on Geothermal Reservoir Engineering*.
- Ames, M., Li, K., & Horne, R. (2015). The Utility of Threshold Reactive Tracers for Characterizing Temperature Distributions in Geothermal Reservoirs. *Mathematical Geosciences*, 47(1). <https://doi.org/10.1007/s11004-013-9506-x>
- Angayarkanni, S. A., & Philip, J. (2013). Effect of Nanoparticles Aggregation on Thermal and Electrical Conductivities of Nanofluids. *Journal of Nanofluids*, 3(1). <https://doi.org/10.1166/jon.2014.1083>
- Armstead, H. C. H., & Tester, J. W. (1987). *Heat mining: a new source of energy*. Spon Press.
- Augustine, C. (2016). Update to enhanced geothermal system resource potential estimate. *Transactions - Geothermal Resources Council*, 40.
- Augustine, C. R., Ho, J. L., & Blair, N. J. (2019). *GeoVision Analysis Supporting Task Force Report: Electric Sector Potential to Penetration*.
- Axelsson, G., Stefánsson, V., Björnsson, G., & Liu, J. (2005). Sustainable management of geothermal resources and utilization for 100--300 years. *Proceedings World Geothermal Congress*, 8.
- Becker, M. W., Coleman, T. I., & Ciervo, C. C. (2020). Distributed Acoustic Sensing as a Distributed Hydraulic Sensor in Fractured Bedrock. *Water Resources Research*, 56(9). <https://doi.org/10.1029/2020WR028140>
- Beckers, K. F., Kolker, A., Pauling, H., McTigue, J. D., & Kesseli, D. (2021). Evaluating the feasibility of geothermal deep direct-use in the United States. *Energy Conversion and Management*, 243, 114335.
- Beckers, K. F., Lukawski, M. Z., Anderson, B. J., Moore, M. C., & Tester, J. W. (2014). Levelized costs of electricity and direct-use heat from Enhanced Geothermal Systems. *Journal of Renewable and Sustainable Energy*, 6(1). <https://doi.org/10.1063/1.4865575>
- Beckers, K. F., & McCabe, K. (2019). GEOPHIRES v2.0: updated geothermal techno-economic simulation tool. *Geothermal Energy*, 7(1). <https://doi.org/10.1186/s40517-019-0119-6>

- Beentjes, I. (2018). *Dissolution and thermal spallation of Barre granite using pure and chemically enhanced hydrothermal jets*.
- Beentjes, I., Bender, J. T., Hawkins, A. J., & Tester, J. W. (2020). Chemical Dissolution Drilling of Barre Granite Using a Sodium Hydroxide Enhanced Supercritical Water Jet. *Rock Mechanics and Rock Engineering*, 53(2). <https://doi.org/10.1007/s00603-019-01912-7>
- Beentjes, I., Bender, J. T., & Tester, J. W. (2019). Dissolution and Thermal Spallation of Barre Granite Using Pure Water Hydrothermal Jets. *Rock Mechanics and Rock Engineering*, 52(5). <https://doi.org/10.1007/s00603-018-1647-2>
- Bershaw, J. (2020). *An Integrated Feasibility Study of Reservoir Thermal Energy Storage (RTES) in Portland, OR, USA*.
- Beyers, S., & Racle, O. (2020). SuperCOPs: Hybrid Geothermal Heat Pump Systems for Exceptional Economics, Environmental Performance, and Operational Control. *Proceedings, World Geothermal Congress 2020*.
- Blackwell, D. D., Richards, M. C., & Frone, Z. S. (2013). *SMU Geothermal Resource Map*.
- Boissavy, C. (2020). *Report reviewing existing insurance schemes for geothermal, GEORISK*. [https://www.georisk-project.eu/wp-content/uploads/2020/02/D3.1\\_Report-reviewing-geothermal-risk-mitigation-schemes-v2.pdf](https://www.georisk-project.eu/wp-content/uploads/2020/02/D3.1_Report-reviewing-geothermal-risk-mitigation-schemes-v2.pdf)
- Bromley, C. J., Mongillo, M., & Rybach, L. (2006). Sustainable utilization strategies and promotion of beneficial environmental effects--Having your cake and eating it too. *Proceedings of the New Zealand Geothermal Workshop 2006*.
- Buijze, L., Van Bijsterveldt, L., Cremer, H., Paap, B., Veldkamp, H., Wassing, B. B. T., Van Wees, J. D., Van Yperen, G. C. N., & Ter Heege, J. H. (2020). Review of induced seismicity in geothermal systems worldwide and implications for geothermal systems in the Netherlands. In *Geologie en Mijnbouw/Netherlands Journal of Geosciences*. <https://doi.org/10.1017/njg.2019.6>
- C2ES - Center for Climate and Energy Solutions. (2019). *U.S. State Greenhouse Gas Emissions Targets*. <https://www.c2es.org/document/greenhouse-gas-emissions-targets/>
- Cao, V., Schaffer, M., & Licha, T. (2018). The feasibility of using carbamates to track the thermal state in geothermal reservoirs. *Geothermics*, 72. <https://doi.org/10.1016/j.geothermics.2017.12.006>
- Cao, V., Schaffer, M., Taherdangkoo, R., & Licha, T. (2020). Solute reactive tracers for hydrogeological applications: A short review and future prospects. In *Water (Switzerland)* (Vol. 12, Issue 3). <https://doi.org/10.3390/w12030653>
- Carslaw, H. S., & Jaeger, J. C. (1959). *Conduction of heat in solids*. Oxford University Press, London, 2nd edition, p. 407.
- Champ, D. R., & Schroeter, J. (1988). Bacterial transport in fractured rock. A field-scale tracer test at the Chalk River nuclear laboratories. *Water Science and Technology*, 20(11–12). <https://doi.org/10.2166/wst.1988.0269>
- Chi, B., Huang, L., Gao, K., Ajo-Franklin, J., Kneafsey, T. J., & EGS Collab Team. (2020). Anisotropic Imaging of Created Fractures in EGS Collab Experiments Using CASSM Data. *45th Workshop on Geothermal Reservoir Engineering*, 6.
- Chrysikopoulos, C. V. (1993). Artificial tracers for geothermal reservoir studies. *Environmental*

*Geology*, 22(1). <https://doi.org/10.1007/BF00775286>

- Daniilidis, A., Nick, H. M., & Bruhn, D. F. (2021). Interference between geothermal doublets across a fault under subsurface uncertainty; implications for field development and regulation. *Geothermics*, 91. <https://doi.org/10.1016/j.geothermics.2021.102041>
- Dean, C., Reimus, P., Oates, J., Rose, P., Newell, D., & Petty, S. (2015). Laboratory experiments to characterize cation-exchanging tracer behavior for fracture surface area estimation at Newberry Crater, OR. *Geothermics*, 53, 213–224.
- DiPippo, R. (2012). *Geothermal Power Plants: Principles, Applications, Case Studies and Environmental Impact*. Butterworth-Heinemann, 3rd edition.
- DOE - U.S. Department of Energy. (2017). *Energy Department Announces up to \$4 Million for Geothermal Deep Direct-Use Feasibility Studies*. <https://www.energy.gov/eere/articles/energy-department-announces-4-million-geothermal-deep-direct-use-feasibility-studies>
- Domra Kana, J., Djongyang, N., Raïdandi, D., Njandjock Nouck, P., & Dadjé, A. (2015). A review of geophysical methods for geothermal exploration. In *Renewable and Sustainable Energy Reviews* (Vol. 44). <https://doi.org/10.1016/j.rser.2014.12.026>
- Dumas, P., Garabetian, T., Le Guéan, T., Kłepińska, B., Kasztelewicz, A., Karytsas, S., Siddiqi, G., Lupi, N., Syidov, F., Nador, A., Kaufhold, J., Boissavy, C., Yildirim, C., Bozkurt, C., Kujbus, A., Spyridonos, E., Oztekin, R., & Link, K. (2019). Risk Mitigation and Insurance Schemes Adapted to Geothermal Market Maturity: The Right Scheme for my Market. *European Geothermal Congress 2019*. <http://europeangeothermalcongress.eu/wp-content/uploads/2019/07/244.pdf>
- Eberle, A., Heath, G. A., Carpenter Petri, A. C., & Nicholson, S. R. (2017). *Systematic Review of Life Cycle Greenhouse Gas Emissions from Geothermal Electricity* (Issue NREL/TP-6A20-68474). National Renewable Energy Lab.(NREL), Golden, Colorado (United States).
- EBN – Energie Beheer Nederland. (2020). *De warmtetransitie: ‘Aardwarmte is een essentiële warmtebron.’* [https://www.ebn.nl/focus/warmtetransitie/?utm\\_source=linkedin&utm\\_medium=social&utm\\_campaign=focus2020\\_2](https://www.ebn.nl/focus/warmtetransitie/?utm_source=linkedin&utm_medium=social&utm_campaign=focus2020_2)
- EGEC - European Geothermal Energy Council. (2013). *Financing Geothermal Energy*. EGEC policy paper. <https://www.egec.org/wp-content/uploads/2017/05/EGEC-policy-paper-on-financing-geothermal-Fin.pdf>
- EGEC - European Geothermal Energy Council. (2021). *2020 EGEC Geothermal Market Report*. <https://www.egec.org/media-publications/egec-geothermal-market-report-2020/>
- EIA - U.S. Energy Information Administration. (2018). *2015 Residential Energy Consumption Survey (RECS)*. <https://www.eia.gov/consumption/residential/data/2015/>
- EIA - U.S. Energy Information Administration. (2019a). *2012 Commercial Buildings Energy Consumption Survey (CBECS)*. <https://www.eia.gov/consumption/commercial/data/2012>
- EIA - U.S. Energy Information Administration. (2019b). *Electric Power Annual*. <https://www.eia.gov/electricity/annual/>
- EIA - U.S. Energy Information Administration. (2020a). *State Energy Data System (SEDS): 1960-2018 (complete)*. <https://www.eia.gov/state/seds/seds-data-complete.php?sid=US#Consumption>



- EIA - U.S. Energy Information Administration. (2020b). *U.S. energy facts explained*. <https://www.eia.gov/energyexplained/us-energy-facts/>
- EIA - U.S. Energy Information Administration. (2020c). *U.S. Residential natural gas price by State*. [https://www.eia.gov/dnav/ng/ng\\_pri\\_sum\\_a\\_EPG0\\_PRS\\_DMcf\\_a.htm](https://www.eia.gov/dnav/ng/ng_pri_sum_a_EPG0_PRS_DMcf_a.htm)
- EIDoradoWeather. (2021). *Mean Total Heating Degree Days*. <https://eldoradoweather.com/climate/US Climate Maps/Lower 48 States/Temperature/Mean Total Heating Degree Days/Gallery/mean-total-heating-degree-days.html>
- EPA - U.S. Environmental Protection Agency. (2020). Inventory of U.S. Greenhouse gas Emissions and Sinks: 1990-2018. In *430-R-20-002*. <https://www.epa.gov/sites/production/files/2020-04/documents/us-ghg-inventory-2020-main-text.pdf>
- EPA - U.S. Environmental Protection Agency. (2021). *State Inventory Tool (SIT)*. <https://www.epa.gov/statelocalclimate/state-inventory-and-projection-tool>
- EPA – U.S. Environmental Protection Agency. (2020). *Energy Star – Geothermal Heat Pumps*. [https://www.energystar.gov/products/energy\\_star\\_most\\_efficient\\_2020/geothermal\\_heat\\_pumps](https://www.energystar.gov/products/energy_star_most_efficient_2020/geothermal_heat_pumps)
- European Technology and Innovation Platform on Deep Geothermal (ETIP-DG). (2018). *Vision for deep geothermal*. [https://www.etip-dg.eu/front/wp-content/uploads/ETIP-DG\\_Vision\\_web.pdf](https://www.etip-dg.eu/front/wp-content/uploads/ETIP-DG_Vision_web.pdf)
- EuroStat. (2020a). *Electricity production, consumption and market overview*. [https://ec.europa.eu/eurostat/statistics-explained/index.php/Electricity\\_production,\\_consumption\\_and\\_market\\_overview](https://ec.europa.eu/eurostat/statistics-explained/index.php/Electricity_production,_consumption_and_market_overview)
- EuroStat. (2020b). *Natural gas prices for household consumers, second half of 2019*. [https://ec.europa.eu/eurostat/statistics-explained/index.php/Natural\\_gas\\_price\\_statistics](https://ec.europa.eu/eurostat/statistics-explained/index.php/Natural_gas_price_statistics)
- Ezzedine, S. M., Rubenchik, A., & Yamamoto, R. (2015). Laser-enhanced drilling and laser assisted fracturing for subsurface EGS applications. *40th Workshop on Geothermal Reservoir Engineering*.
- Fox, D. B., Sutter, D., Beckers, K. F., Lukawski, M. Z., Koch, D. L., Anderson, B. J., & Tester, J. W. (2013). Sustainable heat farming: Modeling extraction and recovery in discretely fractured geothermal reservoirs. *Geothermics*, 46. <https://doi.org/10.1016/j.geothermics.2012.09.001>
- Fox, D. B., Sutter, D., & Tester, J. W. (2011). The thermal spectrum of low-temperature energy use in the United States. *Energy and Environmental Science*, 4(10). <https://doi.org/10.1039/c1ee01722e>
- Fridleifsson, I. B., Bertani, R., Huenges, E., Lund, J. W., Ragnarsson, A., & Rybach, L. (2008). The possible role and contribution of geothermal energy to the mitigation of climate change. *IPCC Scoping Meeting on Renewable Energy Sources, Proceedings, Luebeck, Germany, 20(25)*, 59–80.
- Friedrich, J., Mengpin, G., & Tankou, A. (2017). *6 Charts to Understand U.S. State Greenhouse Gas Emissions*. <https://www.wri.org/blog/2017/08/6-charts-understand-us-state-greenhouse-gas-emissions>

- Garapati, N., & Hause, J. (2020). *Feasibility of Deep Direct-Use Geothermal on the West Virginia University Campus-Morgantown, WV*. DOE EERE – Geothermal Technologies Program Final Technical Report.
- Gee, B., Gracie, R., & Dusseault, M. B. (2021). Multiscale short-circuiting mechanisms in multiple fracture enhanced geothermal systems. *Geothermics*, 94. <https://doi.org/10.1016/j.geothermics.2021.102094>
- GeoDH. (2014a). *Developing geothermal district heating in Europe*. <http://geodh.eu/wp-content/uploads/2015/02/D.6.3-Final-Publishable-Report-Office-Print.pdf>
- GeoDH. (2014b). *GeoDH Case Studies*. <http://geodh.eu/database/>
- Glassley, W. E. (2014). *Geothermal energy: renewable energy and the environment*. CRC press.
- Goldstein, B., Hiriart, G., Bertani, R., Bromley, C., Gutierrez-Negrin, L., Huenges, E., Muraoka, H., Ragnarsson, A., Tester, J., & Zui, V. (2011). Geothermal Energy. In O. Edenhofer, R. Pichs-Madruga, Y. Sokona, K. Seyboth, P. Matschoss, S. Kadner, T. Zwickel, P. Eickemeier, G. Hansen, S. Schlomer, & C. von Stechow (Eds.), *IPCC Special Report on Renewable Energy Sources and Climate Change Mitigation*. Cambridge University Press, Cambridge, United Kingdom and New York, NY, United States. <https://doi.org/10.1017/CBO9781139151153.008>
- Grigsby, C. O., & Tester, J. W. (1989). Rock-water interactions in the Fenton Hill, New Mexico, hot dry rock geothermal systems. II. Modeling geochemical behavior. *Geothermics*, 18(5–6). [https://doi.org/10.1016/0375-6505\(89\)90099-0](https://doi.org/10.1016/0375-6505(89)90099-0)
- Gringarten, A. C. (1978). Reservoir lifetime and heat recovery factor in geothermal aquifers used for urban heating. *Pure and Applied Geophysics PAGEOPH*, 117(1–2). <https://doi.org/10.1007/BF00879755>
- Gunnlaugsson, E., Frimannson, H., & Sverrisson, G. A. (2000). District heating in Reykjavik--70 years experience. *Proceedings, World Geothermal Congress*, 28, 2087–2092.
- Hager, B. H., Dieterich, J., Frohlich, C., Juanes, R., Mantica, S., Shaw, J. H., Bottazzi, F., Caresani, F., Castineira, D., Cominelli, A., Meda, M., Osculati, L., Petroselli, S., & Plesch, A. (2021). A process-based approach to understanding and managing triggered seismicity. *Nature*, 595(7869). <https://doi.org/10.1038/s41586-021-03668-z>
- Hamm, V., Bouzit, M., & Lopez, S. (2016). Assessment of complex well architecture performance for geothermal exploitation of the Paris basin: A modeling and economic analysis. *Geothermics*, 64. <https://doi.org/10.1016/j.geothermics.2016.06.008>
- Hawkins, A. J., Becker, M. W., & Tester, J. W. (2018). Inert and Adsorptive Tracer Tests for Field Measurement of Flow-Wetted Surface Area. *Water Resources Research*, 54(8). <https://doi.org/10.1029/2017WR021910>
- Hawkins, A. J., Becker, M. W., & Tsoflias, G. P. (2017). Evaluation of inert tracers in a bedrock fracture using ground penetrating radar and thermal sensors. *Geothermics*, 67, 86–94.
- Hawkins, A. J., Bender, J. T., Grooms, R. D., Schissel, C. J., & Tester, J. W. (2021). Temperature-responsive smart tracers for field-measurement of inter-well thermal evolution: Heterogeneous kinetics and field demonstration. *Geothermics*, 92. <https://doi.org/10.1016/j.geothermics.2021.102046>
- Hawkins, A. J., Fox, D. B., Becker, M. W., & Tester, J. W. (2017). Measurement and simulation

- of heat exchange in fractured bedrock using inert and thermally degrading tracers. *Water Resources Research*, 53(2). <https://doi.org/10.1002/2016WR019617>
- Hawkins, A. J., Fox, D. B., Koch, D. L., Becker, M. W., & Tester, J. W. (2020). Predictive Inverse Model for Advective Heat Transfer in a Short-Circuited Fracture: Dimensional Analysis, Machine Learning, and Field Demonstration. *Water Resources Research*, 56(11). <https://doi.org/10.1029/2020WR027065>
- Hermans, T., Nguyen, F., Robert, T., & Revil, A. (2014). Geophysical methods for monitoring temperature changes in shallow low enthalpy geothermal systems. In *Energies* (Vol. 7, Issue 8). <https://doi.org/10.3390/en7085083>
- Hillson, S. D., & Tester, J. W. (2015). Heat transfer properties and dissolution behavior of barre granite as applied to hydrothermal jet drilling with chemical enhancement. *40th Workshop on Geothermal Reservoir Engineering*.
- Holma, M., & Kuusiniemi, P. (2021). Cosmic-ray based geothermal exploration--A short introduction to muography. *ELEVENTH SYMPOSIUM ON STRUCTURE, COMPOSITION AND EVOLUTION OF THE LITHOSPHERE*, 35.
- Hunt, T. M. (1970). Gravity changes at Wairakei geothermal field, New Zealand. *Bulletin of the Geological Society of America*, 81(2). [https://doi.org/10.1130/0016-7606\(1970\)81\[529:GCAWGF\]2.0.CO;2](https://doi.org/10.1130/0016-7606(1970)81[529:GCAWGF]2.0.CO;2)
- Hunt, T. M., & Graham, D. J. (2009). Gravity changes in the Tauhara sector of the Wairakei-Tauhara geothermal field, New Zealand. *Geothermics*, 38(1). <https://doi.org/10.1016/j.geothermics.2008.12.003>
- Huttrer, G. (2020). Geothermal Power Generation in the World 2015-2020 Update Report. *Proceedings, World Geothermal Congress*.
- Icelandic Government. (2018). *Iceland's Climate Action Plan for 2018-2030-Summary*. [https://www.government.is/library/Files/Iceland's new Climate Action Plan for 2018 2030.pdf](https://www.government.is/library/Files/Iceland's%20new%20Climate%20Action%20Plan%20for%202018%202030.pdf)
- IEA - International Energy Agency. (2019). *Data and Statistics*. [https://www.iea.org/data-and-statistics?country=WORLD&fuel=Energy supply&indicator=TPESbySource](https://www.iea.org/data-and-statistics?country=WORLD&fuel=Energy%20supply&indicator=TPESbySource)
- IFC - International Finance Corporation. (2013). *Success of Geothermal Wells: A Global Study*. <https://www.ifc.org/wps/wcm/connect/22970ec7-d846-47c3-a9f5-e4a65873bd3b/ifc-drilling-success-report-final.pdf>
- Im, K., Avouac, J. P., Heimisson, E. R., & Elsworth, D. (2021). Ridgecrest aftershocks at Coso suppressed by thermal destressing. *Nature*, 595(7865). <https://doi.org/10.1038/s41586-021-03601-4>
- IRENA - International Renewable Energy Agency. (2019). *Global Energy Transformation. The REmap Transition Pathway. A Roadmap to 2050. Background Report*.
- Ito, G., Frazer, N., Lautze, N., Thomas, D., Hinz, N., Waller, D., Whittier, R., & Wallin, E. (2017). Play fairway analysis of geothermal resources across the state of Hawaii: 2. Resource probability mapping. *Geothermics*, 70. <https://doi.org/10.1016/j.geothermics.2016.11.004>
- Jamali, S., Wittig, V., Börner, J., Bracke, R., & Ostendorf, A. (2019). Application of high powered Laser Technology to alter hard rock properties towards lower strength materials for more efficient drilling, mining, and Geothermal Energy production. *Geomechanics for Energy and the Environment*, 20. <https://doi.org/10.1016/j.gete.2019.01.001>

- Johnson, T., Strickland, C., Knox, H., Thomle, J., Vermuel, V., Ulrich, C., Kneafsey, T., Blankenship, D., & Team, E. G. S. C. (2019). EGS Collab project electrical resistivity tomography characterization and monitoring status. *Proceedings, 44th Workshop on Geothermal Reservoir Engineering*.
- Kamila, Z., Kaya, E., & Zarrouk, S. J. (2021). Reinjection in geothermal fields: An updated worldwide review 2020. *Geothermics*, 89. <https://doi.org/10.1016/j.geothermics.2020.101970>
- Khan, N., Abas, N., & Kalair, A. (2015). Pulsed and continuous wave (CW) lasers in the oil, gas, coal and ignition industries. *Lasers in Engineering*, 30(3–4).
- Kong, X. Z., Deuber, C. A., Kittilä, A., Somogyvári, M., Mikutis, G., Bayer, P., Stark, W. J., & Saar, M. O. (2018). Tomographic Reservoir Imaging with DNA-Labeled Silica Nanotracers: The First Field Validation. *Environmental Science and Technology*, 52(23). <https://doi.org/10.1021/acs.est.8b04367>
- Kosynkin, D., & Alaskar, M. (2016). Oil industry first interwell trial of reservoir nanoagent tracers. *Proceedings, SPE Annual Technical Conference and Exhibition*.
- Kwakma, K. A. (1988). Tracer measurements during long-term circulation of the Rosemanowes HDR geothermal system. *Proceedings of 13th Workshop on Geothermal Reservoir Engineering*.
- Langholtz, M. H., Stokes, B. J., & Eaton, L. M. (2016). *2016 Billion-Ton Report: Advancing Domestic Resources for a Thriving Bioeconomy*. Oak Ridge National Laboratory, Oak Ridge, Tennessee.
- Leecaster, K., Ayling, B., Moffitt, G., & Rose, P. (2012). Use of safranin T as a reactive tracer for geothermal reservoir characterization. *Proceedings, 37th Workshop on Geothermal Reservoir Engineering*.
- Lellouch, A., Lindsey, N. J., Ellsworth, W. L., & Biondi, B. L. (2020). Comparison between distributed acoustic sensing and geophones: Downhole microseismic monitoring of the FORGE geothermal experiment. *Seismological Research Letters*, 91(6). <https://doi.org/10.1785/0220200149>
- Limberger, J., Boxem, T., Pluymaekers, M., Bruhn, D., Manzella, A., Calcagno, P., Beekman, F., Cloetingh, S., & van Wees, J.-D. (2018). Geothermal energy in deep aquifers: A global assessment of the resource base for direct heat utilization. *Renewable and Sustainable Energy Reviews*, 82, 961–975. <https://doi.org/https://doi.org/10.1016/j.rser.2017.09.084>
- Lin, Y. F., Stumpf, A., Frailey, S., Okwen, R., Lu, Y., Holcomb, F., Tinjum, J., Stark, T., Damico, J., Elrick, S., Fisher, K., Fu, W., Garner, D., Hammock, C., Kirksey, J., Korose, C., Lin, J., Lin, Z., McKaskle, R., ... Yang, F. (2020). *Geothermal Heat Recovery Complex: Large-Scale, Deep Direct-Use System in a Low-Temperature Sedimentary Basin* (Issue DE-EE0008106 Final Report).
- Liu, F., Fu, P., Mellors, R. J., Plummer, M. A., Ali, S. T., Reinisch, E. C., Liu, Q., & Feigl, K. L. (2018). Inferring Geothermal Reservoir Processes at the Raft River Geothermal Field, Idaho, USA, Through Modeling InSAR-Measured Surface Deformation. *Journal of Geophysical Research: Solid Earth*, 123(5). <https://doi.org/10.1029/2017JB015223>
- Lowry, T., Finger, J., Carrigan, C., Foris, A., Kennedy, M., Corbet, T., Doughty, C., Pye, S., & Sonnenthal, E. (2017). *GeoVision Analysis Supporting Task Force Report: Reservoir Maintenance and Development*.

- Lowry, T. S., Ayling, B., Hinz, N., Sabin, A., Arguello, R., Blake, K., & Tiedeman, A. (2020). *Deep Direct-Use Geothermal Feasibility Study for Hawthorne, NV* (Issues SAND2020-3210).
- Lukawski, M. (2010). *Optimization of the Operation of Space Heating Systems Connected to District Heating for an Improved Cooling of the Primary Water*. AGH University of Science and Technology, Cracow, Poland.
- Lukawski, Maciej Z., Anderson, B. J., Augustine, C., Capuano, L. E., Beckers, K. F., Livesay, B., & Tester, J. W. (2014). Cost analysis of oil, gas, and geothermal well drilling. In *Journal of Petroleum Science and Engineering* (Vol. 118). <https://doi.org/10.1016/j.petrol.2014.03.012>
- Lukawski, Maciej Z., Tester, J. W., & Dipippo, R. (2017). Impact of molecular structure of working fluids on performance of organic Rankine cycles (ORCs). *Sustainable Energy and Fuels*, 1(5). <https://doi.org/10.1039/c6se00064a>
- Lukawski, Maciej Z., Vilaetis, K., Gkogka, L., Beckers, K. F., Anderson, B. J., & Tester, J. W. (2013). A proposed hybrid geothermal-natural gas-biomass energy system for Cornell University. Technical and economic assessment of retrofitting a low-temperature geothermal district heating system and heat cascading solutions. *Proceedings, 38th Workshop on Geothermal Reservoir Engineering*.
- Ma, J., Zhang, P., Tian, S., Sheng, M., Xu, Q., & Lu, Z. (2020). Carbon dots as fluorescent sensitive tracers in reservoir engineering. *ARMA-CUPB Geothermal International Conference 2019*.
- Majer, E. L., Baria, R., Stark, M., Oates, S., Bommer, J., Smith, B., & Asanuma, H. (2007). Induced seismicity associated with Enhanced Geothermal Systems. *Geothermics*, 36(3). <https://doi.org/10.1016/j.geothermics.2007.03.003>
- Majer, E., Nelson, J., Robertson-Tait, A., Savy, J., & Wong, I. (2012). *Protocol for addressing induced seismicity associated with enhanced geothermal systems* (Issue DOE/EE-0662).
- Matsumoto, K., Sakikawa, N., & Miyata, T. (2018). Thermo-responsive gels that absorb moisture and ooze water. *Nature Communications*, 9(1). <https://doi.org/10.1038/s41467-018-04810-8>
- McCabe, K., Beckers, K. J., Young, K. R., & Blair, N. J. (2019). *GeoVision Analysis Supporting Task Force Report: Thermal Applications. Quantifying Technical, Economic, and Market Potential of Geothermal District Heating Systems in the United States*.
- McCabe, K., Gleason, M., Reber, T., & Young, K. R. (2016). Characterizing u.s. heat demand for potential application of geothermal direct use. *Transactions - Geothermal Resources Council*, 40.
- McDonald, R. I., Fargione, J., Kiesecker, J., Miller, W. M., & Powell, J. (2009). Energy sprawl or energy efficiency: Climate policy impacts on natural habitat for the United States of America. *PLoS ONE*, 4(8). <https://doi.org/10.1371/journal.pone.0006802>
- Millstein, D., McCall, J., Macknick, J., Nicholson, S., Keyser, D., Jeong, S., & Heath, G. (2019). *GeoVision Analysis Supporting Task Force Report: Impacts. The Employment Opportunities, Water Impacts, Emission Reductions, and Air Quality Improvements of Achieving High Penetrations of Geothermal Power in the United States* (Issue NREL/TP-

6A20-71933).

- Mock, J. E., Tester, J. W., & Wright, P. M. (1997). Geothermal energy from the earth: its potential impact as an environmentally sustainable resource. *Annual Review of Energy and the Environment*, 22(1), 305–356.
- Mohamed, A., Salehi, S., & Ahmed, R. (2021). Significance and complications of drilling fluid rheology in geothermal drilling: A review. In *Geothermics* (Vol. 93). <https://doi.org/10.1016/j.geothermics.2021.102066>
- Muffler, L. J. P. (1979). *Assessment of geothermal resources of the United States, 1978*.
- Mullane, M., Gleason, M., McCabe, K., Mooney, M., Reber, T., & Young, K. R. (2016). *An Estimate of Shallow, Low-Temperature Geothermal Resources of the United States*.
- Murphy, H. D., Tester, J. W., Grigsby, C. O., & Potter, R. M. (1981). Energy extraction from fractured geothermal reservoirs in low- permeability crystalline rock. *Journal of Geophysical Research*, 86(B8). <https://doi.org/10.1029/JB086iB08p07145>
- NAS - National Academy of Sciences, Engineering, and Medicine. (2021). *Accelerating Decarbonization of the U.S. Energy System*.
- NCSL - National Conference of State Legislatures. (2020). *Greenhouse Gas Emissions Reduction Targets and Market-based Policies*. <https://www.ncsl.org/research/energy/greenhouse-gas-emissions-reduction-targets-and-market-based-policies.aspx>
- Neupane, G., Mattson, E. D., Plummer, M. A., Podgorney, R. K., & EGS Collab Team. (2020). ) Results of multiple tracer injections into fractures in the EGS Collab Testbed-1. *Proceedings of 45th Workshop on Geothermal Reservoir Engineering*.
- Nottebohm, M., Licha, T., & Sauter, M. (2012). Tracer design for tracking thermal fronts in geothermal reservoirs. *Geothermics*, 43. <https://doi.org/10.1016/j.geothermics.2012.02.002>
- Oh, K. W., Lee, K., Ahn, B., & Furlani, E. P. (2012). Design of pressure-driven microfluidic networks using electric circuit analogy. In *Lab on a Chip* (Vol. 12, Issue 3). <https://doi.org/10.1039/c2lc20799k>
- Pandey, S. N., & Vishal, V. (2017). Sensitivity analysis of coupled processes and parameters on the performance of enhanced geothermal systems. *Scientific Reports*, 7(1). <https://doi.org/10.1038/s41598-017-14273-4>
- Patterson, J. R., Cardiff, M., Coleman, T., Wang, H., Feigl, K. L., Akerley, J., & Spielman, P. (2017). Geothermal reservoir characterization using distributed temperature sensing at Brady Geothermal Field, Nevada. *The Leading Edge*, 36(12), 1024a1--1024a7.
- Peng, C., Pan, B., Xue, L., & Liu, H. (2019). Geophysical survey of geothermal energy potential in the Liaoji Belt, northeastern China. *Geothermal Energy*, 7(1). <https://doi.org/10.1186/s40517-019-0130-y>
- Podgorney, R., Huang, H., & Gaston, D. (2010). A fully-coupled, implicit, finite element model for simultaneously solving multiphase fluid flow, heat transport, and rock deformation. *Transactions - Geothermal Resources Council*, 34 1.
- Potter, R. M., Potter, F. M., & Wideman, T. W. (2010). Laboratory study and field demonstration of hydrothermal spallation drilling. *Transactions - Geothermal Resources Council*, 34 1.

- Ragnarsson, A. (2016). Overview of direct geothermal applications and uses worldwide. *III GGDP Roundtable*.  
[https://www.esmap.org/sites/esmap.org/files/DocumentLibrary/1Overview of direct geothermal applications Árni R.pdf](https://www.esmap.org/sites/esmap.org/files/DocumentLibrary/1Overview%20of%20direct%20geothermal%20applications%20Arni%20R.pdf)
- Reber, T J. (2013). *Evaluating Opportunities for Enhanced Geothermal System-Based District Heating in New York and Pennsylvania*. Cornell University.
- Reber, Timothy J., Beckers, K. F., & Tester, J. W. (2014). The transformative potential of geothermal heating in the U.S. energy market: A regional study of New York and Pennsylvania. *Energy Policy*, 70. <https://doi.org/10.1016/j.enpol.2014.03.004>
- Reimus, P., Caporuscio, F., Marina, O., & Janney, D. (2020). Field demonstration of the combined use of thermally-degrading and cation-exchanging tracers to predict thermal drawdown in a geothermal reservoir. *Geothermics*, 83.  
<https://doi.org/10.1016/j.geothermics.2019.101712>
- Reinsch, T., Hennings, J., Götz, J., Jousset, P., Bruhn, D., & Lüth, S. (2015). Distributed Acoustic Sensing Technology for Seismic Exploration in Magmatic Geothermal Areas. *World Geothermal Congress 2015, Melbourne, Australia, April 19-25, 2015*.
- Robinson, B. A., Tester, J. W., & Brown, L. F. (1988). RESERVOIR SIZING USING INERT AND CHEMICALLY REACTING TRACERS. *SPE Formation Evaluation*, 3(1).  
<https://doi.org/10.2118/13147-PA>
- Rose, P. E., Benoit, W. R., & Kilbourn, P. M. (2001). The application of the polyaromatic sulfonates as tracers in geothermal reservoirs. *Geothermics*, 30(6).  
[https://doi.org/10.1016/S0375-6505\(01\)00024-4](https://doi.org/10.1016/S0375-6505(01)00024-4)
- Rowley, J. C. (1982). Worldwide geothermal resources. *Handbook of Geothermal Energy*, 44–176.
- Rudolph, B., Berson, J., Held, S., Nitschke, F., Wenzel, F., Kohl, T., & Schimmel, T. (2020). Development of thermo-reporting nanoparticles for accurate sensing of geothermal reservoir conditions. *Scientific Reports*, 10(1). <https://doi.org/10.1038/s41598-020-68122-y>
- Rui, F., & Zhao, G. F. (2021). Experimental and numerical investigation of laser-induced rock damage and the implications for laser-assisted rock cutting. *International Journal of Rock Mechanics and Mining Sciences*, 139. <https://doi.org/10.1016/j.ijrmms.2021.104653>
- Rybach, L., Megel, T., & Eugster, W. J. (2000). At what time scale are geothermal resources renewable? *Proceedings World Geothermal Congress 2000 Kyushu-Tohoku, Japan*.
- Sander, M. (2016). Geothermal district heating systems: Country case studies from China, Germany, Iceland, and United States of America, and schemes to overcome the gaps. *Transactions - Geothermal Resources Council*, 40.
- Sanjuan, B., Pinault, J.-L., Rose, P., Gérard, A., Brach, M., Braibant, G., Crouzet, C., Foucher, J.-C., Gautier, A., & Touzelet, S. (2006). Tracer testing of the geothermal heat exchanger at Soultz-sous-Forêts (France) between 2000 and 2005. *Geothermics*, 35(5–6), 622–653.
- Sanyal, S. K., Butler, S. J., Swenson, D., & Hardeman, B. (2000). Review of the State-of-the-Art of numerical simulation of enhanced geothermal systems. *World Geothermal Congress*.
- Schaffer, M., Idzik, K. R., Wilke, M., & Licha, T. (2016). Amides as thermo-sensitive tracers for investigating the thermal state of geothermal reservoirs. *Geothermics*, 64.  
<https://doi.org/10.1016/j.geothermics.2016.05.004>

- Schaffer, M., Maier, F., Licha, T., & Sauter, M. (2013). A new generation of tracers for the characterization of interfacial areas during supercritical carbon dioxide injections into deep saline aquifers: Kinetic interface-sensitive tracers (KIS tracer). *International Journal of Greenhouse Gas Control*, 14. <https://doi.org/10.1016/j.ijggc.2013.01.020>
- Schoenball, M., Ajo-Franklin, J., Blankenship, D., Cook, P., Dobson, P., Guglielmi, Y., Fu, P., Kneafsey, T., Knox, H., Petrov, P., Robertson, M., Schwering, P., Templeton, D., Ulrich, C., Wood, T., & EGS Collab Team. (2019). Microseismic monitoring of meso-scale stimulations for the DOE EGS Collab project at the Sanford Underground Research Facility. *Proceedings of 44th Workshop on Geothermal Reservoir Engineering, Stanford University, Stanford, California, February 11-13, 2019*.
- Schütz, F., Huenges, E., Spalek, A., Bruhn, D., Pérez, P., & de Gregorio, M. (2013). *Geothermal Electricity: Potential for CO2 Mitigation* (Issue GeoElec Deliverable Number 4.6). <http://www.geoelec.eu/wp-content/uploads/2014/02/D4.6.pdf>
- Shah, M., Sircar, A., Vaidya, D., Sahajpal, S., Chaudhary, A., & Dhale, S. (2015). Overview of geothermal surface exploration methods. *Int J Adv Res Innov Ideas Educ*, 1(4), 55–64.
- Shook, G. M. (2001). Predicting thermal breakthrough in heterogeneous media from tracer tests. *Geothermics*, 30(6). [https://doi.org/10.1016/S0375-6505\(01\)00015-3](https://doi.org/10.1016/S0375-6505(01)00015-3)
- Siler, D. L., Zhang, Y., Spycher, N. F., Dobson, P. F., McClain, J. S., Gasperikova, E., Zierenberg, R. A., Schiffman, P., Ferguson, C., Fowler, A., & Cantwell, C. (2017). Play-fairway analysis for geothermal resources and exploration risk in the Modoc Plateau region. *Geothermics*, 69. <https://doi.org/10.1016/j.geothermics.2017.04.003>
- Sinclair, L., Brown, J., Salim, M. G., May, D., Guilvaiee, B., Hawkins, A., & Cathles, L. (2020). Optimization of fluorescence and surface adsorption of citric acid/ethanolamine carbon nanoparticles for subsurface tracers. *Carbon*, 169. <https://doi.org/10.1016/j.carbon.2020.07.024>
- SMU - Southern Methodist University. (2020). *Southern Methodist University Borehole Temperature Observation Data*. <http://geothermal.smu.edu/static/DownloadFilesButtonPage.htm>
- Snyder, D. M., Beckers, K. F., & Young, K. R. (2017). Update on Geothermal Direct-Use Installations in the United States. *Proceedings of 42nd Workshop on Geothermal Reervoir Engineering, Stanford University, Stanford, California, U.S.*
- Soengkono, S., Bromley, C., Reeves, R., Bennie, S., & Graham, D. (2013). Geophysical techniques for low enthalpy geothermal exploration in New Zealand. *Exploration Geophysics*, 44(3). <https://doi.org/10.1071/EG13036>
- Somma, R., Troise, C., Zeni, L., Minardo, A., Fedele, A., Mirabile, M., & De Natale, G. (2019). Long-term monitoring with fiber optics distributed temperature sensing at campi flegrei: The campi flegrei deep drilling project. *Sensors (Switzerland)*, 19(5). <https://doi.org/10.3390/s19051009>
- Song, X., Lyu, Z., Cui, L., Li, G., Ji, G., & Pang, Z. (2017). Comparison of numerical analysis on the downhole flow field for multi-orifice hydrothermal jet drilling technology for geothermal wells. *Geothermics*, 70, 314–323.
- Stefansson, V. (2005). World geothermal assessment. *Proceedings, World Geothermal*



Congress.

- Steiner, A., Yumkella, K. K., Clos, J., & Begin, G. V. (2015). *District Energy in Cities: Unlocking the Potential of Energy Efficiency and Renewable Energy*.
- Suzuki, A., Cui, J., Zhang, Y., Uehara, S., Li, K., Horne, R. N., & Ito, T. (2020). Experimental Study on Nano-/Microparticles Transport to Characterize Structures in Fractured Porous Media. *Rock Mechanics and Rock Engineering*, 53(10). <https://doi.org/10.1007/s00603-020-02081-8>
- Suzuki, A., Ikhwanda, F., Yamaguchi, A., & Hashida, T. (2019). Estimations of fracture surface area using tracer and temperature data in geothermal fields. *Geosciences (Switzerland)*, 9(10). <https://doi.org/10.3390/geosciences9100425>
- Tester, J.W., Reber, T., Beckers, K., Lukawski, M., Camp, E., Aguirre, G. A., Jordan, T., & Horowitz, F. (2015). Integrating Geothermal Energy Use into Re-building American Infrastructure. *Proceedings, World Geothermal Congress*.
- Tester, J W, Herzog, H. J., Chen, Z., Potter, R. M., & Frank, M. G. (1994). Prospects for universal geothermal energy from heat mining. *Science & Global Security*, 5(1), 99–121.
- Tester, J W, Reber, T. J., Beckers, K. F., & Lukawski, M. Z. (2016). Deep geothermal energy for district heating: lessons learned from the US and beyond. In *Advanced district heating and cooling (DHC) systems* (pp. 75–98). Elsevier.
- Tester, Jefferson W., Anderson, B. J., Batchelor, A. S., Blackwell, D. D., DiPippo, R., Drake, E. M., Garnish, J., Livesay, B. J., Moore, M. C., Nicholas, K., Petty, S., Taksoz, M. N., & Veatch, R. W. J. (2006). The Future of Geothermal Energy - Impact of Enhanced Geothermal Systems (EGS) on the United States in the 21st Century. *MIT - Massachusetts Institute of Technology*.
- Tester, Jefferson W., Bivins, R. L., & Potter, R. M. (1982). INTERWELL TRACER ANALYSES OF A HYDRAULICALLY FRACTURED GRANITIC GEOTHERMAL RESERVOIR. *Society of Petroleum Engineers Journal*, 22(4). <https://doi.org/10.2118/8270-PA>
- Tester, Jefferson William, Beyers, S., Gustafson, J. O., Jordan, T. E., Smith, J. D., Aswad, J. A., Beckers, K. F., Allmendinger, R., Brown, L., Horowitz, F., May, D., Ming, K., & Pritchard, M. (n.d.). District geothermal heating using EGS technology to meet carbon neutrality goals: a case study of earth source heat for the Cornell University campus. *Proceedings of the World Geothermal Congress 2020+1*.
- Tester, Jefferson William, Jordan, T., Beyers, S., Gustafson, O., & Smith, J. (2019). *Earth Source Heat: A Cascaded Systems Approach to DDU of Geothermal Energy on the Cornell Campus Final Project Report* (Issue DE-EE0008103). [https://gdr.openei.org/files/1180/DE-EE0008103 Final Report 11.14.2019.pdf](https://gdr.openei.org/files/1180/DE-EE0008103%20Final%20Report%2011.14.2019.pdf)
- TNO, & EGEC. (2013). *A prospective study on the geothermal potential in the EU*. <http://www.geoelec.eu/wp-content/uploads/2013/11/Deliverable-2.5-A-prospective-study-on-the-geothermal-potential-in-Europe.pdf>
- Tunzi, M., Østergaard, D. S., Svendsen, S., Boukhanouf, R., & Cooper, E. (2016). Method to investigate and plan the application of low temperature district heating to existing hydraulic radiator systems in existing buildings. *Energy*, 113. <https://doi.org/10.1016/j.energy.2016.07.033>

- Turchi, C. S., McTigue, J. D. P., Akar, S., Beckers, K. J., Richards, M., Chickering, C., Batir, J., Schumann, H., Tillman, T., & Slivensky, D. (2020). *Geothermal Deep Direct Use for Turbine Inlet Cooling in East Texas* (Issue NREL/TP-5500-74990). <https://www.nrel.gov/docs/fy20o-sti/74990.pdf>
- U.S. Department of Energy. (2019). *GeoVision Full Report*. <https://www.energy.gov/eere/geothermal/geovision>
- USCA - U.S. Climate Alliance. (2019). *Climate Leadership across the Alliance, 2019 State Fact Sheets*. [https://www.usclimatealliance.org/s/USCA\\_2019-State-Factsheets\\_20191011\\_compressed.pdf](https://www.usclimatealliance.org/s/USCA_2019-State-Factsheets_20191011_compressed.pdf)
- Vetter, O. J., & Crichlow, H. B. (1979). *Injection, injectivity and injectability in geothermal operations: problems and possible solutions. Phase I. Definition of the problems* (Issue SAN-2044-1).
- W., L. J., & Toth, A. N. (2020). Direct Utilization of Geothermal Energy 2020 Worldwide Review. *Proceedings of the World Geothermal Congress 2020*. <https://www.geothermal-energy.org/pdf/IGAstandard/WGC/2020/01018.pdf>
- Waite, M., & Modi, V. (2020). Electricity Load Implications of Space Heating Decarbonization Pathways. *Joule*, 4(2). <https://doi.org/10.1016/j.joule.2019.11.011>
- Wang, G., Li, K., Wen, D., Lin, W., Lin, L., Liu, Z., Zhang, W., Ma, F., & Wang, W. (2013). Assessment of geothermal resources in China. *Proceedings, 38th Workshop on Geothermal Reservoir Engineering*.
- Wang, M., Zhang, S., & Edwin, G. N. J. (2017). Hydrothermal Spallation Drilling Technology: An Alternative Method of Geothermal Energy Development. *Advances in Engineering Research*, 86, 302–305. <https://doi.org/10.2991/eame-17.2017.71>
- Weber, J., Born, H., & Moeck, I. (2019). Geothermal Energy Use, Country Update for Germany 2016-2018. *Proceedings, European Geothermal Congress*.
- White, D. E., & Williams, D. L. (1975). *Assessment of geothermal resources of the United States, 1975* (Issues 726–730). US Department of the Interior, Geological Survey.
- White, M. D., Podgorney, R., Kelkar, S. M., McClure, M. W., Danko, G., Ghassemi, A., Fu, P., Bahrami, D., Barbier, C., Cheng, Q., & Chiu, K. K. (2016). *Benchmark problems of the geothermal technologies office code comparison study* (Issue PNNL-26016).
- Wilkinson, M. A., & Tester, J. W. (1993). Experimental measurement of surface temperatures during flame-jet induced thermal spallation. *Rock Mechanics and Rock Engineering*, 26(1). <https://doi.org/10.1007/BF01019868>
- Wright, P. M., Ward, S. H., Ross, H. P., & West, R. C. (1985). State-of-the-art geophysical exploration for geothermal resources. *Geophysics*, 50(12). <https://doi.org/10.1190/1.1441889>
- Wu, H., Fu, P., Morris, J. P., Mattson, E. D., Neupane, G., Smith, M. M., Hawkins, A. J., Zhang, Y., Kneafsey, T., & EGS Collab Team. (2021). Characterization of flow and transport in a fracture network at the EGS Collab field experiment through stochastic modeling of tracer recovery. *Journal of Hydrology*, 593(125888). <https://doi.org/10.1016/j.jhydrol.2020.125888>
- Xia, Y., Plummer, M., Mattson, E., Podgorney, R., & Ghassemi, A. (2017). Design, modeling, and evaluation of a doublet heat extraction model in enhanced geothermal systems. *Renewable Energy*, 105. <https://doi.org/10.1016/j.renene.2016.12.064>

- Yao, C., Lei, G., Hou, J., Xu, X., Wang, D., & Steenhuis, T. S. (2015). Enhanced oil recovery using micron-size polyacrylamide elastic microspheres: underlying mechanisms and displacement experiments. *Industrial & Engineering Chemistry Research*, 54(43), 10925–10934.
- Young, K., Levine, A., Cook, J., Heimiller, D., & Ho, J. (2019). *GeoVision Analysis Supporting Task Force Report: Barriers—An Analysis of Non-Technical Barriers to Geothermal Deployment and Potential Improvement Scenarios* (Issue NREL/PR-6A20-71641). <https://www.nrel.gov/docs/fy19osti/71641.pdf>
- Zaal, C., Daniilidis, A., & Vossepoel, F. C. (2021). Economic and fault stability analysis of geothermal field development in direct-use hydrothermal reservoirs. *Geothermal Energy*, 9(1). <https://doi.org/10.1186/s40517-021-00193-0>
- Zarandi, S., Sahar, M. M., & Ivarsson, G. (2010). A Review on Waste Water Disposal at the Nesjavellir Geothermal Power Plant. In *Proceedings World Geothermal Congress 2010, Bali, Indonesia, 25-29 April 2010*.
- Zhang, Yongbin. (2015). Novel nano bearings constructed by physical adsorption. *Scientific Reports*, 5(1), 1–14.
- Zhang, Yuran, Dekas, A. E., Hawkins, A. J., Parada, A. E., Gorbatenko, O., Li, K., & Horne, R. N. (2020). Microbial Community Composition in Deep-Subsurface Reservoir Fluids Reveals Natural Interwell Connectivity. *Water Resources Research*, 56(2). <https://doi.org/10.1029/2019WR025916>
- Zhang, Yuran, Hartung, M. B., Hawkins, A. J., Dekas, A. E., Li, K., & Horne, R. N. (2021). DNA Tracer Transport Through Porous Media – The Effect of DNA Length and Adsorption. *Water Resources Research*. <https://doi.org/10.1029/2020wr028382>
- Zhang, Z., Gao, P., Qiu, Y., Liu, G., Feng, Y., & Wiesner, M. (2016). Transport of cerium oxide nanoparticles in saturated silica media: Influences of operational parameters and aqueous chemical conditions. *Scientific Reports*, 6. <https://doi.org/10.1038/srep34135>
- Zheng, Q., Liu, C., Tian, Y., & Zhu, H. X. (2018). Seismic imaging of the middle and upper crust by double-difference tomography: the Haicheng earthquake (Ms 7.3) in Liaoning Province. *Applied Geophysics*, 15(1). <https://doi.org/10.1007/s11770-018-0662-0>
- Zyvoloski, G. (2007). *FEHM: A control volume finite element code for simulating subsurface multi-phase multi-fluid heat and mass transfer*. LAUR-07-3359.
- Zyvoloski, G. A., Robinson, B. A., Dash, Z. V., & Trease, L. L. (1997). *Summary of the models and methods for the FEHM application – A finite-element heat- and mass-transfer code*. LA-13307-MS.
